# Supplementary material for: Synthesis of highly active carbon-encapsulated Ni2P catalysts by one-step pyrolysis–phosphidation for hydrodeoxygenation of phenolic compounds
Source: Royal Society of Chemistry journal article supplement (doi:10.1039/d1cy02238e), 2022-01-01
Supplement: d1cy02238e1.pdf [file d1cy02238e1.pdf]

**Synthesis of Highly Active Carbon-encapsulated Ni<sub>2</sub>P  
Catalysts by One-step Pyrolysis–phosphidation for  
Hydrodeoxygenation of Phenolic Compounds**

Shuai Wang<sup>1</sup>, Nan Jiang<sup>1</sup>, Tianhan Zhu<sup>1</sup>, Qiang Zhang<sup>1</sup>, Chunlei Zhang<sup>1</sup>,  
Huan Wang<sup>1</sup>, Yanguang Chen<sup>1</sup>, Feng Li<sup>1</sup>, Hua Song<sup>1,\*</sup>

1 Provincial Key Laboratory of Oil & Gas Chemical Technology, College  
of Chemistry & Chemical Engineering, Northeast Petroleum University,  
Daqing 163318, Heilongjing, China

\*Corresponding author. Tel: 0459-6503167

E-mail: songhua2004@sina.com (Hua Song)

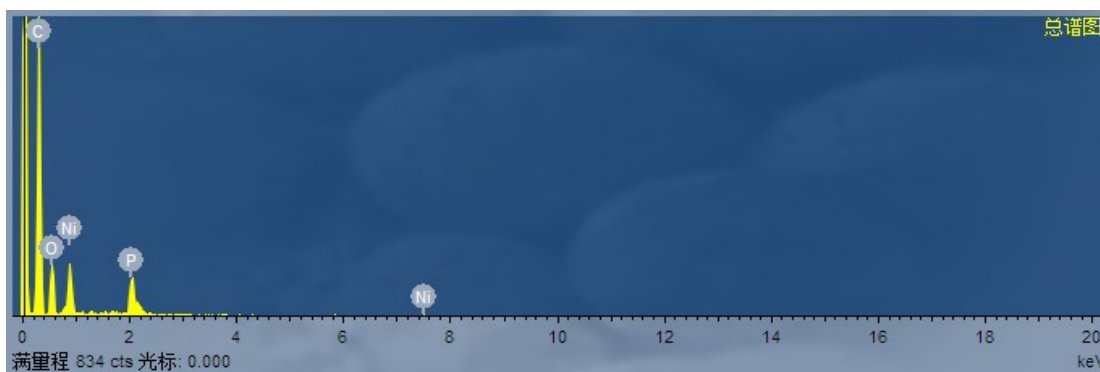

Fig. S1 EDS spectrum Ni<sub>2</sub>P@C(3) catalyst.

Table. S1 Quantitative elemental analysis of Ni<sub>2</sub>P@C(x)

| Catalysts               | Ni  | P    | O    | C    | Ni/P |
|-------------------------|-----|------|------|------|------|
| Ni <sub>2</sub> P@C(1)  | 8.9 | 3.7  | 17.1 | 70.3 | 2.43 |
| Ni <sub>2</sub> P@C(3)  | 8.9 | 8.5  | 13.7 | 68.9 | 1.04 |
| Ni <sub>2</sub> P@C(5)  | 8.8 | 10.5 | 14.4 | 66.3 | 0.84 |
| Ni <sub>2</sub> P@C(7)  | 8.6 | 12.0 | 14.2 | 65.2 | 0.72 |
| Ni <sub>2</sub> P@C(10) | 8.5 | 13.5 | 13.6 | 64.4 | 0.63 |

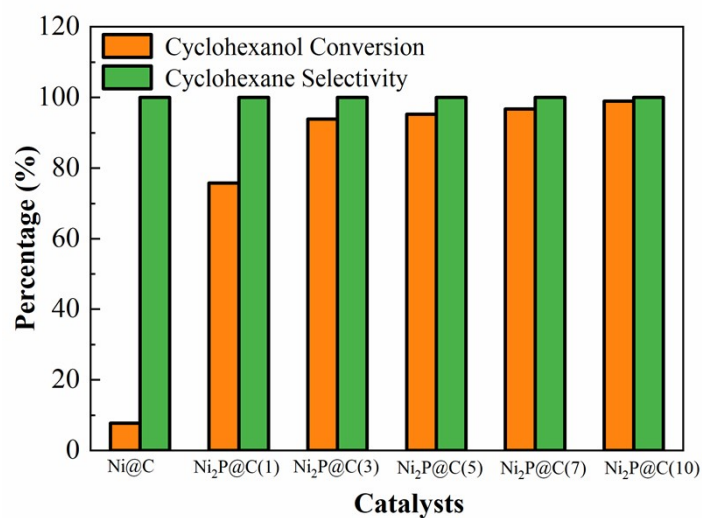

Fig. S2 Dehydration of cyclohexanol over Ni@C and Ni<sub>2</sub>P@C(x) catalysts.

Reaction conditions: T=250 °C, P=2 MPa, t=2 h

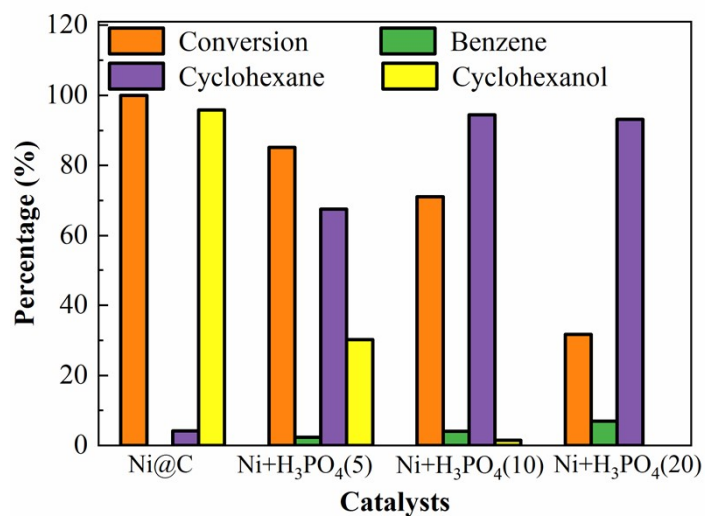

**Fig. S3** HDO of phenol over Ni@C, and Ni+H<sub>3</sub>PO<sub>4</sub>(y) catalysts. Reaction conditions:  $T=250\text{ }^{\circ}\text{C}$ ,  $P=2\text{ MPa}$ ,  $t=2\text{ h}$ .

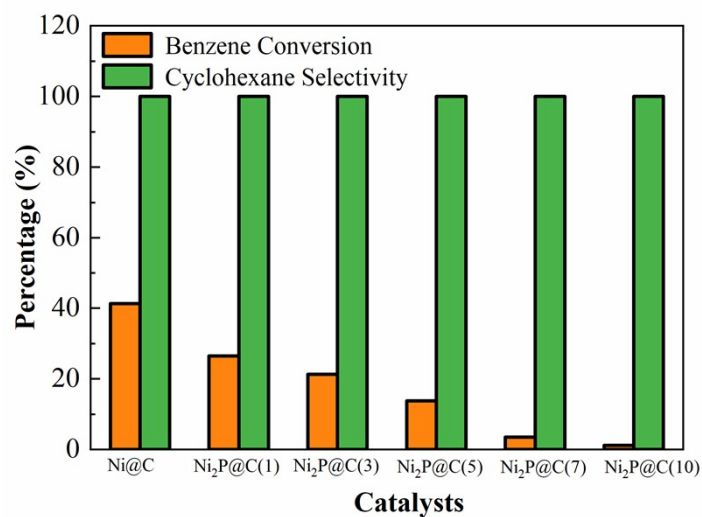

**Fig. S4** Hydrogenation of benzene over Ni@C and Ni<sub>2</sub>P@C(x) catalysts. Reaction conditions:  $T=250\text{ }^{\circ}\text{C}$ ,  $P=2\text{ MPa}$ ,  $t=2\text{ h}$

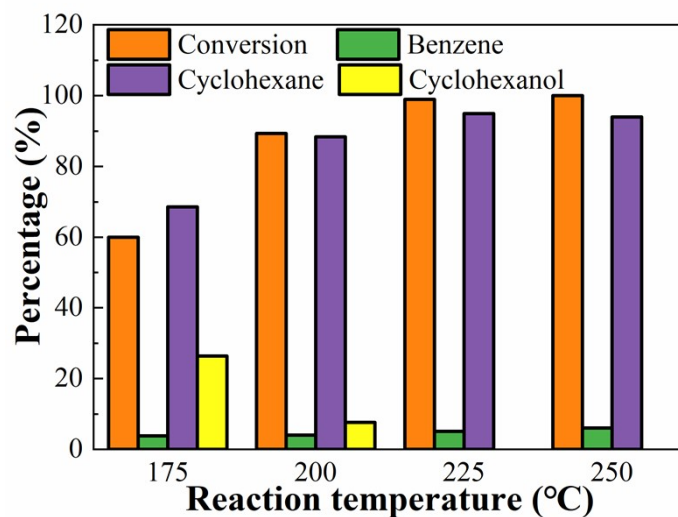

**Fig. S5** Effect of reaction temperature on HDO of phenol over Ni<sub>2</sub>P@C(3).  
Reaction conditions:  $P=2$  MPa,  $t=2$  h.

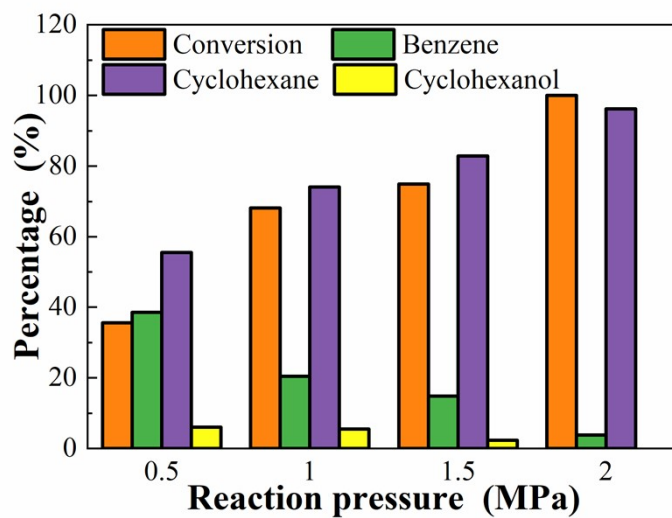

**Fig. S6** Effect of reaction pressure on HDO of phenol over Ni<sub>2</sub>P@C(3).  
Reaction conditions:  $T=250$  °C,  $t=2$  h.

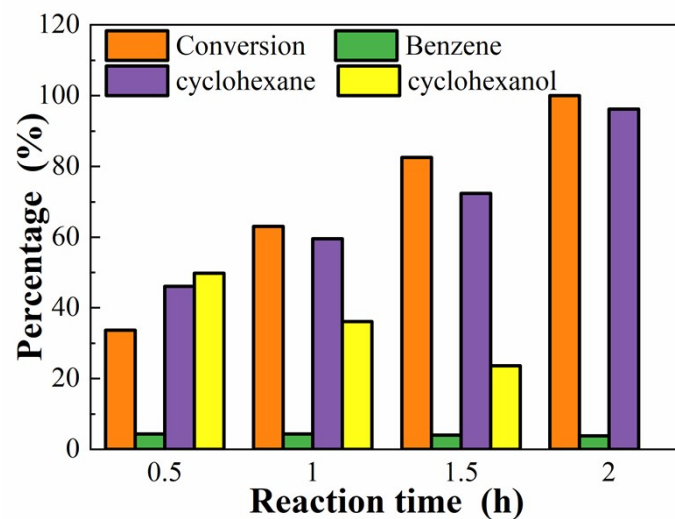

**Fig. S7** Effect of reaction time on HDO of phenol over  $\text{Ni}_2\text{P}@C(3)$ .  
Reaction conditions:  $T=250\text{ }^\circ\text{C}$   $P=2\text{ MPa}$ ,
